# Supplementary material
Source: PubMed Central journal article supplement (PMC6742985)

Supplementary Material for the manuscript  
EXPERIMENTALLY DISENTANGLING INTRINSIC AND EXTRINSIC DRIVERS OF NATAL DISPERSAL IN A  
NOCTURNAL RAPTOR

By Julien Fattebert, Marco Perrig, Beat Naef-Daenzer, Martin U. Grüebler  
Published in Proceedings B, doi 10.1098/rspb.2019.1537

**Figure S1** - Time line of the experimental cross-fostering and supplementary feeding events in relation to the age of juvenile little owls.

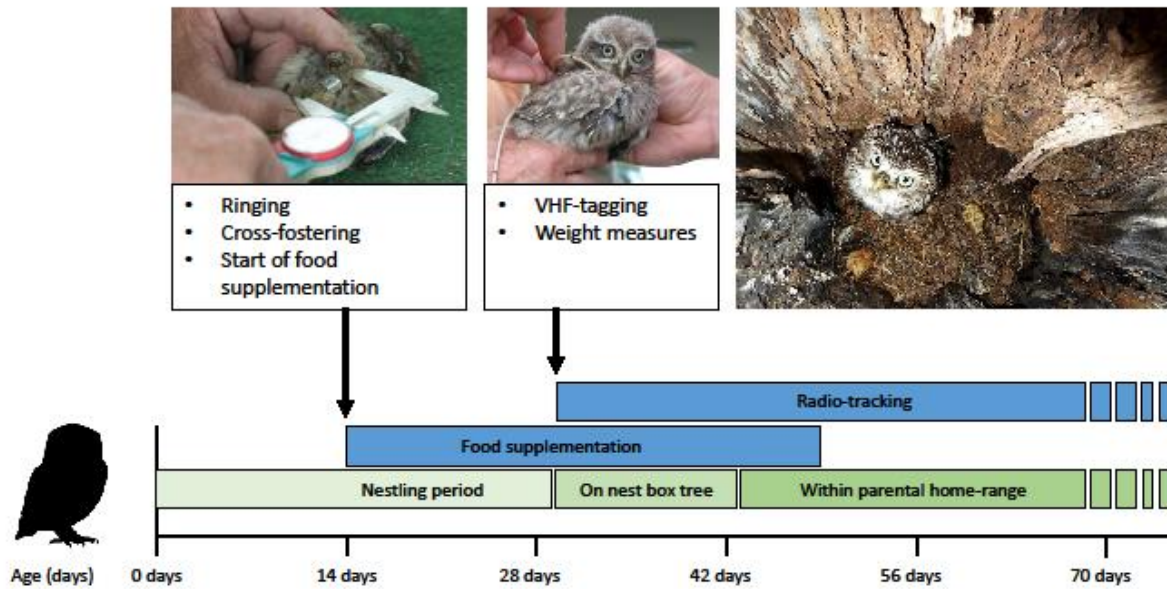

Supplementary Material for the manuscript  
EXPERIMENTALLY DISENTANGLING INTRINSIC AND EXTRINSIC DRIVERS OF NATAL DISPERSAL IN A  
NOCTURNAL RAPTOR

By Julien Fattebert, Marco Perrig, Beat Naef-Daenzer, Martin U. Gruebler

Published in Proceedings B, doi 10.1098/rspb.2019.1537

**Supplement S2** - R script for the analysis of the owl trajectory and segmentation, and R script for the  
Linear Mixed Modelling of the dispersal parameters

```
###-----
```

```
#'R script for the analysis of the owl trajectory and segmentation for the manuscript
```

```
#'EXPERIMENTALLY DISENTANGLING INTRINSIC AND EXTRINSIC DRIVERS OF NATAL DISPERSAL IN A  
NOCTURNAL RAPTOR
```

```
#'by Fattebert Julien, Marco Perrig, Beat Naef-Daenzer & Martin U. Gruebler
```

```
#'Proceedings B doi 10.1098/rspb.2019.157
```

```
###-----
```

```
#'import the telemetry data----
```

```
data <- read.csv(paste0(getwd(),"/Fattebert et al dispersal_S2_little_owl_telemetry_data.csv"))
```

```
names(data)
```

```
data$CRS[1]
```

```
#spatialise the data
```

```
require(sp)
```

```
coordinates(data) <- c("x","y")
```

```
projection(data) <- CRS("+init=epsg:31466")
```

```
#'-----
```

```
#HMM model
```

```
#'-----
```

```
require(moveHMM)
```

```
trackData <- data[, c("ring", "x", "y", "loc_age", "DATETIMEn", "sex", "fed", "crossF", "phase")]
```

```
colnames(trackData)[1] <- "ID"
```

```
trackData <- trackData[order(trackData$loc_age),]
```

Supplementary Material for the manuscript  
EXPERIMENTALLY DISENTANGLING INTRINSIC AND EXTRINSIC DRIVERS OF NATAL DISPERSAL IN A  
NOCTURNAL RAPTOR

By Julien Fattebert, Marco Perrig, Beat Naef-Daenzer, Martin U. Grüebler

Published in Proceedings B, doi 10.1098/rspb.2019.1537

```
trackData <- trackData[order(trackData$ID),]

trackData.1 <- droplevels(subset(trackData,phase!="forays")) #all data excluding data during forays
phase

trackData.2 <- droplevels(subset(trackData,phase=="dispersal")) #data excluding forays, and within natal
range data

natal <- droplevels(subset(trackData,phase=="natal")) #data in the natal range

natal.last <- natal[ natal$DATETIMEn == ave(natal$DATETIMEn, natal$ID, FUN=max), ] #last location in
the natal range

trackData <- rbind(natal.last, trackData.2) #data excluding forays, and within natal range data, but
including the very last relocation within the natal range

#function 'preData()' takes "ID" into account

hmm.data <- prepData(trackData,type="UTM",coordNames=c("x","y"))

#'3 stage model HHMM----

#'initial parameters for gamma and von Mises distributions----

mu0 <- c(0.1,0.5,3)

sigma0 <- c(0.05,0.5,1)

zeromass0 <- c(0.05,0.0001,0.0001)

stepPar0 <- c(mu0,sigma0,zeromass0)

angleMean0 <- c(pi,pi,0)

kappa0 <- c(1,1,1)

anglePar0 <- c(angleMean0,kappa0)

#fitting function----

data.3modes <- fitHMM(data=hmm.data,nbStates=3, stepPar0=stepPar0,
anglePar0=anglePar0, stationary=T)
```

Supplementary Material for the manuscript  
EXPERIMENTALLY DISENTANGLING INTRINSIC AND EXTRINSIC DRIVERS OF NATAL DISPERSAL IN A  
NOCTURNAL RAPTOR

By Julien Fattebert, Marco Perrig, Beat Naef-Daenzer, Martin U. Grüebler  
Published in Proceedings B, doi 10.1098/rspb.2019.1537

```
data.3modes_states <- viterbi(data.3modes)

#'-----
#'plot 3-stage model
#'-----

model_data <- cbind(hmm.data, data.3modes_states)
names(model_data)
model_times <- list()
breaks <- data.frame()
unique_id <- levels(model_data$ID)
for(i in 1:nlevels(model_data$ID))
{
  model_times[[i]] <- droplevels(subset(model_data, ID == unique_id[i]))
  model_times[[i]]$dx <- model_times[[i]]$x - model_times[[i]][1,]$x
  model_times[[i]]$dy <- model_times[[i]]$y - model_times[[i]][1,]$y
  model_times[[i]]$NSD <- sqrt( model_times[[i]]$dx^2 + model_times[[i]]$dy^2)
  model_times[[i]]$switch <- c(NA, diff(model_times[[i]]$data.3modes_states)) #this identifies when
breaks happen
}

#identify the movement mode and break points to indentify timing----
transfers <- do.call(rbind.data.frame, model_times)
transfers.3 <- droplevels(subset(transfers, data.3modes_states == 3)) #transfer is mode 3

transfers.2 <- droplevels(subset(transfers, data.3modes_states == 2 & switch == -1)) #switch from 3 to 2
transfers.1 <- droplevels(subset(transfers, data.3modes_states == 1 & switch == -2)) #switch from 3 to 1
settle.n <- rbind(transfers.2, transfers.1)
```

Supplementary Material for the manuscript  
EXPERIMENTALLY DISENTANGLING INTRINSIC AND EXTRINSIC DRIVERS OF NATAL DISPERSAL IN A  
NOCTURNAL RAPTOR

By Julien Fattebert, Marco Perrig, Beat Naef-Daenzer, Martin U. Grüebler

Published in Proceedings B, doi 10.1098/rspb.2019.1537

```
transf <- rbind(transfers.3, transfers.2, transfers.1)
transf <- transf[order(transf$ID),]
transf <- transf[order(transf$loc_age),]

xmin <- min(do.call("rbind", model_times)$dx)
xmax <- max(do.call("rbind", model_times)$dx)
ymin <- min(do.call("rbind", model_times)$dy)
ymax <- max(do.call("rbind", model_times)$dy)

for(i in 1:nlevels(model_data$ID))
{
  gender <- unique(model_times[[i]]$sex)

  eqsplot(model_times[[i]]$dx, model_times[[i]]$dy, type="",
col="lightgrey",main=unique(model_times[[i]]$ID))

  points(model_times[[i]]$dx, model_times[[i]]$dy, col=model_times[[i]]$data.3modes_states,
pch=model_times[[i]]$data.3modes_states)

  plot(model_times[[i]]$NSD*1000 ~ model_times[[i]]$loc_age, col="lightgrey",type="l", main=paste(i))

  points(model_times[[i]]$NSD*1000 ~ model_times[[i]]$loc_age,
col=model_times[[i]]$data.3modes_states, pch=model_times[[i]]$data.3modes_states)

  switches <- subset(model_times[[i]], switch!=0)

  abline(v=c(switches$loc_age), lty=2, lwd=2, col="blue")

  breaks <- rbind(breaks, switches)
}

#all switches to settlement
settle <- droplevels(subset(transf, switch<(0)))

#identify age at first settlement
```

Supplementary Material for the manuscript  
EXPERIMENTALLY DISENTANGLING INTRINSIC AND EXTRINSIC DRIVERS OF NATAL DISPERSAL IN A  
NOCTURNAL RAPTOR

By Julien Fattebert, Marco Perrig, Beat Naef-Daenzer, Martin U. Gruebler  
Published in Proceedings B, doi 10.1098/rspb.2019.1537

```
settle_1 <- as.data.frame(setDT(settle)[, .SD[which.min(loc_age)], by=ID])
```

```
###-----
```

```
##R script for the analysis of the dispersal parameters for the manuscript
```

```
##EXPERIMENTALLY DISENTANGLING INTRINSIC AND EXTRINSIC DRIVERS OF NATAL DISPERSAL IN A  
NOCTURNAL RAPTOR
```

```
##by Fattebert Julien, Marco Perrig, Beat Naef-Daenzer & Martin U. Gruebler
```

```
##Proceedings B doi 10.1098/rspb.2019.157
```

```
###-----
```

```
owl.160 <-  
read.csv(paste0(getwd(),"/Fattebert_little_owl_variables_data_ESM3_10.1098rspb.2019.1537.csv"))
```

```
owl.89 <- droplevels(subset(owl.160, transfer=="completed"))
```

```
###summary statistics----
```

```
#date hatch----
```

```
mean((owl.160$JulianD_hatch))
```

```
sd((owl.160$JulianD_hatch))
```

```
median(owl.160$JulianD_hatch)
```

```
range((owl.160$JulianD_hatch))
```

```
###HSI----
```

```
mean((owl.160$HSI_foster))
```

```
sd((owl.160$HSI_foster))
```

```
median(owl.160$HSI_foster)
```

```
range((owl.160$HSI_foster))
```

Supplementary Material for the manuscript  
EXPERIMENTALLY DISENTANGLING INTRINSIC AND EXTRINSIC DRIVERS OF NATAL DISPERSAL IN A  
NOCTURNAL RAPTOR

By Julien Fattebert, Marco Perrig, Beat Naef-Daenzer, Martin U. Grüebler  
Published in Proceedings B, doi 10.1098/rspb.2019.1537

#age at 1st foray----

mean((owl.160\$ageforay))

sd((owl.160\$ageforay))

median(owl.160\$ageforay)

range((owl.160\$ageforay))

#foray duration-----

mean((owl.160\$duraforay))

sd((owl.160\$duraforay))

median(owl.160\$duraforay)

range((owl.160\$duraforay))

#age emigration----

mean((owl.160\$ageemigr))

sd((owl.160\$ageemigr))

median(owl.160\$ageemigr)

range((owl.160\$ageemigr))

##duration transfer----

mean((owl.89\$duratrans))

sd((owl.89\$duratrans))

median((owl.89\$duratrans))

range((owl.89\$duratrans))

names(stats)

#net dispersal distance

Supplementary Material for the manuscript  
EXPERIMENTALLY DISENTANGLING INTRINSIC AND EXTRINSIC DRIVERS OF NATAL DISPERSAL IN A  
NOCTURNAL RAPTOR

By Julien Fattebert, Marco Perrig, Beat Naef-Daenzer, Martin U. Grüebler  
Published in Proceedings B, doi 10.1098/rspb.2019.1537

```
mean((owl.89$net_dist))/1000
```

```
sd((owl.89$net_dist))/1000
```

```
median((owl.89$net_dist))/1000
```

```
range((owl.89$net_dist))/1000
```

```
###Statistical modelling----
```

```
require(rstanarm)
```

```
###
```

```
#age at first foray----
```

```
###
```

```
Imm.ageforay <- stan_lmer(sqrt(ageforay) ~ sex + JulianD_hatch + fed*HSI_foster  
  +(1 | year_hatch) +(1 | fam_foster) +(1 | fam_hatch), data=owl.160, REML=F,  
  prior_intercept=normal(9, 2),  
  prior=normal(0,5))
```

```
summary(Imm.ageforay)
```

```
qqnorm(resid(Imm.ageforay))
```

```
qqline(resid(Imm.ageforay))
```

```
#bayesian simulations----
```

```
bsim <- as.matrix(Imm.ageforay)
```

```
dimnames(bsim)$parameters
```

```
#fixed effects----
```

```
round(mean(bsim[,1]), 3) #intercept
```

```
round(quantile(bsim[,1], c(0.025, 0.975)), 3)
```



Supplementary Material for the manuscript  
EXPERIMENTALLY DISENTANGLING INTRINSIC AND EXTRINSIC DRIVERS OF NATAL DISPERSAL IN A  
NOCTURNAL RAPTOR

By Julien Fattebert, Marco Perrig, Beat Naef-Daenzer, Martin U. Grüebler  
Published in Proceedings B, doi 10.1098/rspb.2019.1537

```
round(mean(bsim[,2]), 3) #sex
```

```
round(quantile(bsim[,2], c(0.025, 0.975)), 3)
```

```
round(mean(bsim[,3]), 3) #JulianD_hatch
```

```
round(quantile(bsim[,3], c(0.025, 0.975)), 3)
```

```
round(mean(bsim[,4]), 3) #fed
```

```
round(quantile(bsim[,4], c(0.025, 0.975)), 3)
```

```
round(mean(bsim[,5]), 3) #HSI_foster
```

```
round(quantile(bsim[,5], c(0.025, 0.975)), 3)
```

```
round(mean(bsim[,6]), 3) #fedxHSI_foster
```

```
round(quantile(bsim[,6], c(0.025, 0.975)), 3)
```

```
#random effects----
```

```
round(mean(bsim[,163]), 3)
```

```
round(quantile(bsim[,163], c(0.025, 0.975)), 3)
```

```
round(mean(bsim[,164]), 3)
```

```
round(quantile(bsim[,164], c(0.025, 0.975)), 3)
```

```
round(mean(bsim[,165]), 3)
```

```
round(quantile(bsim[,165], c(0.025, 0.975)), 3)
```

```
####
```

Supplementary Material for the manuscript  
EXPERIMENTALLY DISENTANGLING INTRINSIC AND EXTRINSIC DRIVERS OF NATAL DISPERSAL IN A  
NOCTURNAL RAPTOR

By Julien Fattebert, Marco Perrig, Beat Naef-Daenzer, Martin U. Grüebler

Published in Proceedings B, doi 10.1098/rspb.2019.1537

```
###plot Fig. 2----
```

```
newHSI_foster <- seq(min(owl.160$HSI_foster),max(owl.160$HSI_foster), length.out=100)
```

```
newdat <- expand.grid(sex = factor("f", levels=levels(as.factor(owl.160$sex))),
```

```
  JulianD_hatch = mean(owl.160$JulianD_hatch),
```

```
  fed = c("fed","unfed"),
```

```
  HSI_foster = newHSI_foster)
```

```
newdat <- newdat[order(newdat$fed), ]; newdat
```

```
Xmat <- model.matrix(~ sex +JulianD_hatch +fed *HSI_foster, data = newdat)
```

```
b <- apply(bsim[,1:6],2,mean) ### what is this?
```

```
newdat$fit <- Xmat%*% b
```

```
nsim <- nrow(bsim[,1:6])
```

```
predmat <- matrix(ncol=nsim, nrow = nrow(newdat))
```

```
for (i in 1:nsim){
```

```
  predmat[ , i] <- Xmat %*% bsim[i,1:6]
```

```
}
```

```
owl.160.u <- droplevels(subset(owl.160, fed=='unfed'))
```

```
owl.160.s <- droplevels(subset(owl.160, fed=='fed'))
```

```
pdf("Fig2-HSI-R2.pdf", height=4.4, width=5.4)
```

```
op <- par(mfrow=c(1,1), tcl=0.2, oma = c(0,0,1,1), mar=c(4,4,0.5,0.5))
```

```
plot(NA, NA, las = 1, type = "n", ylim=c(20,140), xlim = c(min(newHSI_foster),
```

```
  max(newHSI_foster)), xlab = "Habitat Suitability Index", ylab = "Age (day)", cex.lab = 1,  
  bty="n", xaxt="n")
```

```
axis(1,at=seq(0.55, 1.0, 0.05),labels=Cs( 0.60, , 0.70, , 0.80, , 0.90, , "1.0"), pos=20)
```

Supplementary Material for the manuscript  
EXPERIMENTALLY DISENTANGLING INTRINSIC AND EXTRINSIC DRIVERS OF NATAL DISPERSAL IN A  
NOCTURNAL RAPTOR

By Julien Fattebert, Marco Perrig, Beat Naef-Daenzer, Martin U. Grüebler

Published in Proceedings B, doi 10.1098/rspb.2019.1537

```

polygon(c(newHSI_foster,rev(newHSI_foster)), c((apply(predmat [1:length(newHSI_foster), ], 1,
quantile, prob = 0.025))^2, rev((apply(predmat [1:length(newHSI_foster), ], 1, quantile, prob =
0.975))^2), border=NA, col=rgb(19,27,29,67,maxColorValue = 255))

lines(newHSI_foster, ((Xmat %*% fixef(lmm.ageforay))[1:length(newHSI_foster)])^2, col="black", lwd=2)

polygon(c(newHSI_foster,rev(newHSI_foster)), c((apply(predmat
[(length(newHSI_foster)+1):(2*length(newHSI_foster)), ], 1, quantile, prob = 0.025))^2,
rev((apply(predmat [(length(newHSI_foster)+1):(2*length(newHSI_foster)), ], 1, quantile, prob =
0.975))^2), border=NA, col=rgb(19,27,29,33,maxColorValue = 255))

lines(newHSI_foster, ((Xmat %*%
fixef(lmm.ageforay))[(length(newHSI_foster)+1):(2*length(newHSI_foster))])^2, col="black",
      lty=2, lwd=2)

legend(0.606,130, c("", ""), fill=c(rgb(19,27,29,67,maxColorValue = 255),
      rgb(19,27,29,33,maxColorValue = 255)),
      bty = "n", cex=1)

legend(0.6,130, c("fed","unfed"),bty = "n", cex=1, lty=1:2)

points(owl.160.u$ageforay ~ owl.160.u$HSI_foster)

points(owl.160.s$ageforay ~ owl.160.s$HSI_foster, pch=20)

par(op)

dev.off()

#dev.off()----

#random effect variance (same additive fixed structure for all models)----

lmm.ageforay.var <- stan_lmer(sqrt(ageforay) ~ sex + JulianD_hatch + fed + HSI_foster
      +(1 | year_hatch) +(1 | fam_foster) +(1 | fam_hatch), data=owl.160, REML=F,
      prior_intercept=normal(9, 2),
      prior=normal(0,5))

bsim <- as.matrix(lmm.ageforay.var)
```

Supplementary Material for the manuscript  
EXPERIMENTALLY DISENTANGLING INTRINSIC AND EXTRINSIC DRIVERS OF NATAL DISPERSAL IN A  
NOCTURNAL RAPTOR

By Julien Fattebert, Marco Perrig, Beat Naef-Daenzer, Martin U. Grüebler  
Published in Proceedings B, doi 10.1098/rspb.2019.1537

```
dimnames(bsim)$parameters
```

```
round(mean(bsim[,162]), 3) #year_hatch
```

```
round(quantile(bsim[,162], c(0.025, 0.975)), 3)
```

```
round(mean(bsim[,163]), 3) #fam_foster
```

```
round(quantile(bsim[,163], c(0.025, 0.975)), 3)
```

```
round(mean(bsim[,164]), 3) #fam_hatch
```

```
round(quantile(bsim[,164], c(0.025, 0.975)), 3)
```

```
###
```

```
#duration foray----
```

```
###
```

```
Imm.duraforay <- stan_lmer(sqrt(duraforay) ~ sex + JulianD_hatch + fed + HSI_foster + ageforay  
  +(1 | year_hatch) +(1 | fam_foster) +(1 | fam_hatch), data=owl.160, REML=F,  
  prior_intercept=normal(4, 3),  
  prior=normal(0,5))
```

```
summary(Imm.duraforay)
```

```
qqnorm(resid(Imm.duraforay))
```

```
qqline(resid(Imm.duraforay))
```

```
#bayesian simulations----
```

```
bsim <- as.matrix(Imm.duraforay)
```

Supplementary Material for the manuscript  
EXPERIMENTALLY DISENTANGLING INTRINSIC AND EXTRINSIC DRIVERS OF NATAL DISPERSAL IN A  
NOCTURNAL RAPTOR

By Julien Fattebert, Marco Perrig, Beat Naef-Daenzer, Martin U. Grüebler  
Published in Proceedings B, doi 10.1098/rspb.2019.1537

```
dimnames(bsim)$parameters
```

```
#fixed effects----
```

```
round(mean(bsim[,1]), 3) #intercept
```

```
round(quantile(bsim[,1], c(0.025, 0.975)), 3)
```

```
round(mean(bsim[,2]), 3) #sex
```

```
round(quantile(bsim[,2], c(0.025, 0.975)), 3)
```

```
round(mean(bsim[,3]), 3) #JulianD_hatch
```

```
round(quantile(bsim[,3], c(0.025, 0.975)), 3)
```

```
round(mean(bsim[,4]), 3) #fed
```

```
round(quantile(bsim[,4], c(0.025, 0.975)), 3)
```

```
round(mean(bsim[,5]), 3) #HSI_foster
```

```
round(quantile(bsim[,5], c(0.025, 0.975)), 3)
```

```
round(mean(bsim[,6]), 3) #ageforay
```

```
round(quantile(bsim[,6], c(0.025, 0.975)), 3)
```

```
#random effects----
```

```
round(mean(bsim[,163]), 3) #bYY
```

```
round(quantile(bsim[,163], c(0.025, 0.975)), 3)
```

```
round(mean(bsim[,164]), 3) #fam_foster
```

```
round(quantile(bsim[,164], c(0.025, 0.975)), 3)
```

Supplementary Material for the manuscript  
EXPERIMENTALLY DISENTANGLING INTRINSIC AND EXTRINSIC DRIVERS OF NATAL DISPERSAL IN A  
NOCTURNAL RAPTOR

By Julien Fattebert, Marco Perrig, Beat Naef-Daenzer, Martin U. Grüebler  
Published in Proceedings B, doi 10.1098/rspb.2019.1537

```
round(mean(bsim[,165]), 3) #fam_hatch
```

```
round(quantile(bsim[,165], c(0.025, 0.975)), 3)
```

```
#random effect variance (same additive fixed structure for all models)----
```

```
lmm.duraforay.var <- stan_lmer(sqrt(duraforay) ~ sex + JulianD_hatch + fed + HSI_foster  
  +(1 | year_hatch) +(1 | fam_foster) +(1 | fam_hatch), data=owl.160, REML=F,  
  prior_intercept=normal(4, 3),  
  prior=normal(0,5))
```

```
bsim <- as.matrix(lmm.duraforay.var)
```

```
dimnames(bsim)$parameters
```

```
round(mean(bsim[,162]), 3)
```

```
round(quantile(bsim[,162], c(0.025, 0.975)), 3)
```

```
round(mean(bsim[,163]), 3)
```

```
round(quantile(bsim[,163], c(0.025, 0.975)), 3)
```

```
round(mean(bsim[,164]), 3)
```

```
round(quantile(bsim[,164], c(0.025, 0.975)), 3)
```

```
###
```

```
#age emigration----
```

```
###
```

```
lmm.ageemigr <- stan_lmer(sqrt(ageemigr) ~ sex + JulianD_hatch + fed + HSI_foster + ageforay + duraforay  
  +(1 | year_hatch) +(1 | fam_foster) +(1 | fam_hatch), data=owl.160, REML=F,
```

Supplementary Material for the manuscript  
EXPERIMENTALLY DISENTANGLING INTRINSIC AND EXTRINSIC DRIVERS OF NATAL DISPERSAL IN A  
NOCTURNAL RAPTOR

By Julien Fattebert, Marco Perrig, Beat Naef-Daenzer, Martin U. Grüebler  
Published in Proceedings B, doi 10.1098/rspb.2019.1537

```
prior_intercept=normal(10, 4),
```

```
prior=normal(0,5)
```

```
summary(Imm.ageemirg)
```

```
qqnorm(resid(Imm.ageemirg))
```

```
qqline(resid(Imm.ageemirg))
```

```
#bayesian simulations----
```

```
bsim <- as.matrix(Imm.emi160)
```

```
dimnames(bsim)$parameters
```

```
#fixed effects
```

```
round(mean(bsim[,1]), 3) #intercept
```

```
round(quantile(bsim[,1], c(0.025, 0.975)), 3)
```

```
round(mean(bsim[,2]), 3) #sex
```

```
round(quantile(bsim[,2], c(0.025, 0.975)), 3)
```

```
round(mean(bsim[,3]), 3) #JulianD_hatch
```

```
round(quantile(bsim[,3], c(0.025, 0.975)), 3)
```

```
round(mean(bsim[,4]), 3) #fed
```

```
round(quantile(bsim[,4], c(0.025, 0.975)), 3)
```

```
round(mean(bsim[,5]), 3) #HSI_foster
```

```
round(quantile(bsim[,5], c(0.025, 0.975)), 3)
```

Supplementary Material for the manuscript  
EXPERIMENTALLY DISENTANGLING INTRINSIC AND EXTRINSIC DRIVERS OF NATAL DISPERSAL IN A  
NOCTURNAL RAPTOR

By Julien Fattebert, Marco Perrig, Beat Naef-Daenzer, Martin U. Grüebler  
Published in Proceedings B, doi 10.1098/rspb.2019.1537

```
round(mean(bsim[,6]), 3) #age foray
```

```
round(quantile(bsim[,6], c(0.025, 0.975)), 3)
```

```
round(mean(bsim[,7]), 3) #duration foray
```

```
round(quantile(bsim[,7], c(0.025, 0.975)), 3)
```

```
#random effects----
```

```
round(mean(bsim[,164]), 3)
```

```
round(quantile(bsim[,164], c(0.025, 0.975)), 3)
```

```
round(mean(bsim[,165]), 3)
```

```
round(quantile(bsim[,165], c(0.025, 0.975)), 3)
```

```
round(mean(bsim[,166]), 3)
```

```
round(quantile(bsim[,166], c(0.025, 0.975)), 3)
```

```
#random effect variance (same additive fixed structure for all models)----
```

```
Imm.ageemigr.var <- stan_lmer(sqrt(ageemigr) ~ sex + JulianD_hatch + fed + HSI_foster  
  +(1 | year_hatch) +(1 | fam_foster) +(1 | fam_hatch), data=owl.160, REML=F,  
  prior_intercept=normal(10, 4),  
  prior=normal(0,5))
```

```
bsim <- as.matrix(Imm.ageemigr.var)
```

```
dimnames(bsim)$parameters
```

```
round(mean(bsim[,162]), 3)
```



Supplementary Material for the manuscript  
EXPERIMENTALLY DISENTANGLING INTRINSIC AND EXTRINSIC DRIVERS OF NATAL DISPERSAL IN A  
NOCTURNAL RAPTOR

By Julien Fattebert, Marco Perrig, Beat Naef-Daenzer, Martin U. Grüebler  
Published in Proceedings B, doi 10.1098/rspb.2019.1537

```
round(quantile(bsim[,162], c(0.025, 0.975)), 3)
```

```
round(mean(bsim[,163]), 3)
```

```
round(quantile(bsim[,163], c(0.025, 0.975)), 3)
```

```
round(mean(bsim[,164]), 3)
```

```
round(quantile(bsim[,164], c(0.025, 0.975)), 3)
```

```
###
```

```
##duration transfer----
```

```
####
```

```
Imm.duratrans <- stan_lmer(sqrt(duratrans) ~ sex + JulianD_hatch + fed + HSI_foster + ageemigr  
  +(1 | year_hatch) +(1 | fam_hatch) +(1 | fam_foster), data=owl.89, REML=F,  
  prior_intercept=normal(4, 2),  
  prior=normal(0,5))
```

```
summary(Imm.duratrans)
```

```
qqnorm(resid(Imm.duratrans))
```

```
qqline(resid(Imm.duratrans))
```

```
#bayesian simulations----
```

```
bsim <- as.matrix(Imm.duratrans)
```

```
dimnames(bsim)$parameters
```

```
#fixed effects----
```

```
round(mean(bsim[,1]), 3) #intercept
```

```
round(quantile(bsim[,1], c(0.025, 0.975)), 3)
```

Supplementary Material for the manuscript  
EXPERIMENTALLY DISENTANGLING INTRINSIC AND EXTRINSIC DRIVERS OF NATAL DISPERSAL IN A  
NOCTURNAL RAPTOR

By Julien Fattebert, Marco Perrig, Beat Naef-Daenzer, Martin U. Grüebler  
Published in Proceedings B, doi 10.1098/rspb.2019.1537

```
round(mean(bsim[,2]), 3) #sex  
round(quantile(bsim[,2], c(0.025, 0.975)), 3)
```

```
round(mean(bsim[,3]), 3) #JulianD_hatch  
round(quantile(bsim[,3], c(0.025, 0.975)), 3)
```

```
round(mean(bsim[,4]), 3) #fed  
round(quantile(bsim[,4], c(0.025, 0.975)), 3)
```

```
round(mean(bsim[,5]), 3) #HSI_foster  
round(quantile(bsim[,5], c(0.025, 0.975)), 3)
```

```
round(mean(bsim[,6]), 3) #age emigration  
round(quantile(bsim[,6], c(0.025, 0.975)), 3)
```

```
#random effects----
```

```
(mean(bsim[,120]))  
(quantile(bsim[,120], c(0.025, 0.975)))
```

```
(mean(bsim[,121]))  
(quantile(bsim[,121], c(0.025, 0.975)))
```

```
(mean(bsim[,122]))  
(quantile(bsim[,122], c(0.025, 0.975)))
```

Supplementary Material for the manuscript  
EXPERIMENTALLY DISENTANGLING INTRINSIC AND EXTRINSIC DRIVERS OF NATAL DISPERSAL IN A  
NOCTURNAL RAPTOR

By Julien Fattebert, Marco Perrig, Beat Naef-Daenzer, Martin U. Grüebler  
Published in Proceedings B, doi 10.1098/rspb.2019.1537

```
#random effect variance (same additive fixed structure for all models)----
```

```
Imm.duratrans.var <- stan_lmer(sqrt(duratrans) ~ sex + JulianD_hatch + fed + HSI_foster  
  +(1 | year_hatch) +(1 | fam_hatch) +(1 | fam_foster), data=owl.89, REML=F,  
  prior_intercept=normal(4, 2),  
  prior=normal(0,5))
```

```
bsim <- as.matrix(Imm.duratrans.var)
```

```
dimnames(bsim)$parameters
```

```
(mean(bsim[,119]))
```

```
(quantile(bsim[,119], c(0.025, 0.975)))
```

```
(mean(bsim[,120]))
```

```
(quantile(bsim[,120], c(0.025, 0.975)))
```

```
(mean(bsim[,121]))
```

```
(quantile(bsim[,121], c(0.025, 0.975)))
```

```
####
```

```
#dispersal distances----
```

```
####
```

```
owl.89$net_dist <- as.numeric(as.character(owl.89$net_dist))
```

```
Imm.net_dist <- stan_lmer(sqrt(net_dist) ~ sex + JulianD_hatch + fed + HSI_foster + ageemigr + duratrans
```

```
  +(1 | year_hatch) +(1 | fam_foster) +(1 | fam_hatch), data=owl.89, REML=F,
```

Supplementary Material for the manuscript  
EXPERIMENTALLY DISENTANGLING INTRINSIC AND EXTRINSIC DRIVERS OF NATAL DISPERSAL IN A  
NOCTURNAL RAPTOR

By Julien Fattebert, Marco Perrig, Beat Naef-Daenzer, Martin U. Grüebler

Published in Proceedings B, doi 10.1098/rspb.2019.1537

```
prior_intercept=normal(3, 2),
```

```
prior=normal(0,5)
```

```
summary(lmm.net_dist)
```

```
qqnorm(resid(lmm.duratrans))
```

```
qqline(resid(lmm.duratrans))
```

```
#bayesian simulations----
```

```
bsim <- as.matrix(lmm.net_dist)
```

```
dimnames(bsim)$parameters
```

```
#fixed effects-----
```

```
round(mean(bsim[,1]), 3) #intercept
```

```
round(quantile(bsim[,1], c(0.025, 0.975)), 3)
```

```
round(mean(bsim[,2]), 3) #sex
```

```
round(quantile(bsim[,2], c(0.025, 0.975)), 3)
```

```
round(mean(bsim[,3]), 3) #JulianD_hatch
```

```
round(quantile(bsim[,3], c(0.025, 0.975)), 3)
```

```
round(mean(bsim[,4]), 3) #fed
```

```
round(quantile(bsim[,4], c(0.025, 0.975)), 3)
```

```
round(mean(bsim[,5]), 3) #HSI_foster
```

```
round(quantile(bsim[,5], c(0.025, 0.975)), 3)
```

Supplementary Material for the manuscript  
EXPERIMENTALLY DISENTANGLING INTRINSIC AND EXTRINSIC DRIVERS OF NATAL DISPERSAL IN A  
NOCTURNAL RAPTOR

By Julien Fattebert, Marco Perrig, Beat Naef-Daenzer, Martin U. Grüebler  
Published in Proceedings B, doi 10.1098/rspb.2019.1537

```
round(mean(bsim[,6]), 3) #age emigration
```

```
round(quantile(bsim[,6], c(0.025, 0.975)), 3)
```

```
round(mean(bsim[,7]), 3) #sex
```

```
round(quantile(bsim[,7], c(0.025, 0.975)), 3)
```

```
#random effects----
```

```
(mean(bsim[,121]))
```

```
(quantile(bsim[,121], c(0.025, 0.975)))
```

```
(mean(bsim[,122]))
```

```
(quantile(bsim[,122], c(0.025, 0.975)))
```

```
(mean(bsim[,123]))
```

```
(quantile(bsim[,123], c(0.025, 0.975)))
```

```
#random effect variance (same additive fixed structure for all models)----
```

```
Imm.net_dist.var <- stan_lmer(sqrt(net_dist) ~ sex + JulianD_hatch + fed + HSI_foster
```

```
  +(1 | year_hatch) +(1 | fam_foster) +(1 | fam_hatch), data=owl.89, REML=F,
```

```
  prior_intercept=normal(3, 2),
```

```
  prior=normal(0,5))
```

```
bsim <- as.matrix(Imm.net)
```

```
dimnames(bsim)$parameters
```

Supplementary Material for the manuscript  
EXPERIMENTALLY DISENTANGLING INTRINSIC AND EXTRINSIC DRIVERS OF NATAL DISPERSAL IN A  
NOCTURNAL RAPTOR

By Julien Fattebert, Marco Perrig, Beat Naef-Daenzer, Martin U. Grüebler

Published in Proceedings B, doi 10.1098/rspb.2019.1537

(mean(bsim[,119]))

(quantile(bsim[,119], c(0.025, 0.975)))

(mean(bsim[,120]))

(quantile(bsim[,120], c(0.025, 0.975)))

(mean(bsim[,121]))

(quantile(bsim[,121], c(0.025, 0.975)))

Supplementary Material for the manuscript  
EXPERIMENTALLY DISENTANGLING INTRINSIC AND EXTRINSIC DRIVERS OF NATAL DISPERSAL IN A  
NOCTURNAL RAPTOR

By Julien Fattebert, Marco Perrig, Beat Naef-Daenzer, Martin U. Grüebler  
Published in Proceedings B, doi 10.1098/rspb.2019.1537

**Table S3** - Fixed and random coefficients and credibility intervals of generalized linear mixed-models investigating factors affecting age at first settlement in 89 little owl fledglings. Coefficients with 95% credibility interval not overlapping zero are denoted significant effects.

| Fixed-effect variables          | Age at first settlement <sup>a</sup> |               |               |
|---------------------------------|--------------------------------------|---------------|---------------|
|                                 | $\beta$                              | Lower 95% CrI | Upper 95% CrI |
| (Intercept)                     | 6.929                                | -0.063        | 0.038         |
| Food supplementation            | 0.035                                | -0.020        | 0.088         |
| Habitat suitability index (HSI) | -0.188                               | -0.409        | 0.038         |
| Males                           | -0.013                               | -0.063        | 0.038         |
| Hatching date                   | -0.005                               | -0.008        | 0.002         |
| Age at emigration               | 0.041                                | -0.039        | 0.042         |
| Transfer duration               | 0.038                                | 0.038         | 0.039         |

<sup>a</sup> Random-effect variance [95% credibility interval]: pre-exchange 0.001 [0.000, 0.005]; post-exchange 0.0008 [0.0000, 0.0040]; year 0.002 [0.000, 0.017]

Supplementary Material for the manuscript  
EXPERIMENTALLY DISENTANGLING INTRINSIC AND EXTRINSIC DRIVERS OF NATAL DISPERSAL IN A  
NOCTURNAL RAPTOR

By Julien Fattebert, Marco Perrig, Beat Naef-Daenzer, Martin U. Grüebler  
Published in Proceedings B, doi 10.1098/rspb.2019.1537

**Figure S4** - Predicted net dispersal distance with 95% CrI in female and male little owl fledglings (closed symbol). Grey circles are raw data of female fledglings, and grey dots are raw data of male fledglings (females: N = 52; males: N = 37).

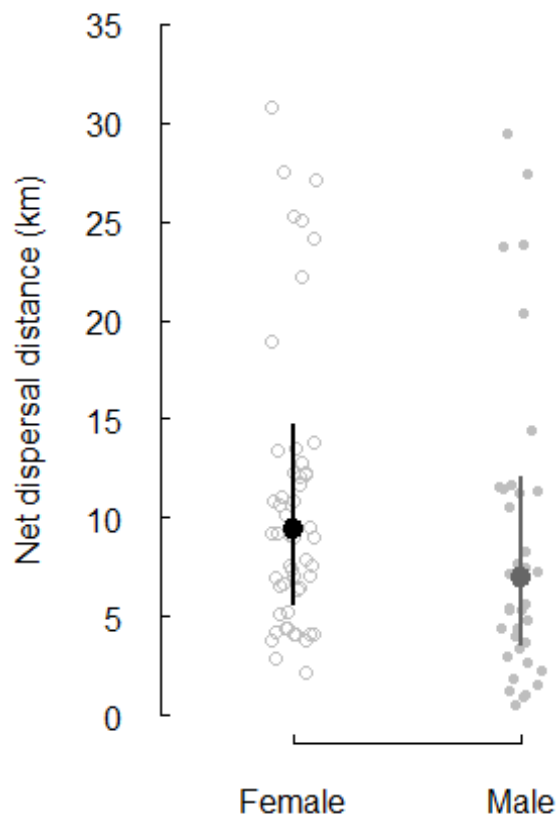

Supplement: rspb20191537supp1.pdf [file rspb20191537supp1.pdf]
